# Supplementary material
Source: PubMed Central journal article supplement (PMC6624829)
Supplement: NIHMS1022850-supplement-2.pdf [file NIHMS1022850-supplement-2.pdf]

## **Exposure to Latent Tuberculosis Treatment During Pregnancy: the PREVENT TB and the iAdhere Trials**

Ruth N. Moro, MD, MPH (1, 2), Nigel A. Scott, MS (1, 2), Andrew Vernon, MD (1), Naomi K. Tepper, MD, MPH (1), Stefan V. Goldberg, MD (1), Kevin Schwartzman, MD, MPH (3), Chi-Chiu Leung, MBBS (4), Neil W. Schluger, MD (5), Robert W. Belknap, MD (6), Richard E. Chaisson, MD (7), Masahiro Narita, MD (8, 9), Elizabeth S. Machado, MD, PhD (10), Marta Lopez, MD, PhD (11), Jorge Sanchez, MD (12,13), Margarita E. Villarino, MD, MPH (1), and Timothy R. Sterling, MD (14)

- 1 Centers for Disease Control and Prevention (CDC), Atlanta, Georgia
- 2 CDC Foundation Research Collaboration, Atlanta, Georgia
- 3 McGill University Health Centre, Respiratory Epidemiology and Clinical Research Unit, Montreal, Quebec, Canada
- 4 Tuberculosis and Chest Service, Department of Health, Hong Kong, China
- 5 Division of Pulmonary, Allergy and Critical Care Medicine, Columbia University Medical Center, New York, New York
- 6 Denver Health and Hospitals, Denver, Colorado
- 7 Johns Hopkins University School of Medicine, Center for Tuberculosis Research, Baltimore, Maryland
- 8 Division of Pulmonary and Critical Care Medicine, University of Washington, Seattle, Washington
- 9 Tuberculosis Control Program Public Health, King County, Seattle, Washington
- 10 Universidad Federal do Rio de Janeiro, Rio de Janeiro, Brazil
- 11 Maternal-fetal Medicine Department. Hospital Clinic and Hospital Sant Joan de Déu, University of Barcelona, Barcelona, Spain
- 12 Asociación Civil IMPACTA Salud y Educacion, Lima, Peru
- 13 Department of Global Health, University of Washington, Seattle, Washington
- 14 Vanderbilt University Medical Center, Nashville, Tennessee

### **Supplement**

## Supplementary Content

**Table E1.** Annual Number of Tuberculosis Cases in the United States from 2000 to 2014

**Table E2.** Demographic Characteristics Among Participants who Reported Pregnancy Versus Those who did not Report Pregnancy

**Table E3.** Demographic Characteristics Among All Participants who Reported Pregnancy During Treatment or Follow-up Versus Those who did not Report Pregnancy

**Table E4.** Pregnancy Safety Assessment During Exposure with 3HP or 9H Treatment

**Table E1. Annual Number of Tuberculosis Cases in the United States from 2000 to 2014**

|                                                           | <b>Tuberculosis cases in 2000</b> | <b>Tuberculosis cases in 2014</b> |
|-----------------------------------------------------------|-----------------------------------|-----------------------------------|
| <b>Total</b>                                              | 16,308                            | 9,421                             |
| <b>Women</b>                                              | 6,105                             | 3,578                             |
| <b>Women in reproductive age<br/>(15–51 years of age)</b> | 3,369                             | 1,927                             |

Robert Pratt; Surveillance Epidemiology and Outbreak Investigations Branch. Division of Tuberculosis Elimination, Centers for Disease Control & Prevention; October 2016 (personal communication)

**Table E2. Demographic Characteristics Among Participants who Reported Pregnancy (Estimated Date of Conception on or Before the Last Study Dose Date) Versus Those who did not Report Pregnancy**

| Characteristic    |                                    | Regimen 3HP<br>(n = 1,729)              |                                                  | Regimen 9H<br>(n = 1,372)               |                                                  | Total<br>(n = 3,101)<br>n (%) |
|-------------------|------------------------------------|-----------------------------------------|--------------------------------------------------|-----------------------------------------|--------------------------------------------------|-------------------------------|
|                   |                                    | Reported pregnancy<br>(n = 31)<br>n (%) | Did not report pregnancy<br>(n = 1,698)<br>n (%) | Reported pregnancy<br>(n = 56)<br>n (%) | Did not report pregnancy<br>(n = 1,316)<br>n (%) |                               |
| Age, median (IQR) |                                    | 23 (21-30)                              | 33 (25-42)                                       | 25 (21-29)                              | 33 (25-42)                                       | 33 (25-42)                    |
| Enrollment Site   | Brazil                             | 2 (6.9)                                 | 120 (7.1)                                        | 1 (1.8)                                 | 122 (9.3)                                        | 245 (7.9)                     |
|                   | Hong Kong                          | 0 (0)                                   | 21 (1.2)                                         | 0 (0)                                   | 0 (0)                                            | 21 (0.7)                      |
|                   | Peru                               | 0 (0)                                   | 2 (0.1)                                          | 0 (0)                                   | 7 (0.5)                                          | 9 (0.3)                       |
|                   | South Africa                       | 0 (0)                                   | 29 (1.7)                                         | 0 (0)                                   | 0 (0)                                            | 29 (0.9)                      |
|                   | Spain                              | 0 (0)                                   | 75 (4.4)                                         | 0 (0)                                   | 32 (2.4)                                         | 107 (3.5)                     |
|                   | United States/Canada               | 29 (93.5)                               | 1451 (85.5)                                      | 55 (98.2)                               | 1155 (87.8)                                      | 2690 (86.8)                   |
| Race              | American Indian/Alaskan Native     | 0 (0)                                   | 17 (1)                                           | 0 (0)                                   | 11 (0.8)                                         | 28 (0.9)                      |
|                   | Asian/Pacific Islander             | 6 (19.4)                                | 210 (12.4)                                       | 9 (16.1)                                | 166 (12.6)                                       | 391 (12.6)                    |
|                   | Black                              | 3 (9.7)                                 | 418 (24.6)                                       | 9 (16.1)                                | 307 (23.3)                                       | 737 (23.8)                    |
|                   | Other                              | 1 (3.2)                                 | 55 (3.2)                                         | 1 (1.8)                                 | 46 (3.5)                                         | 103 (3.3)                     |
|                   | White                              | 21 (67.7)                               | 998 (58.8)                                       | 37 (66.1)                               | 786 (59.7)                                       | 1842 (59.4)                   |
| Alcohol*          | No                                 | 19 (61.3)                               | 1023 (60.2)                                      | 33 (58.9)                               | 805 (61.2)                                       | 1880 (60.7)                   |
|                   | Use                                | 11 (35.5)                               | 615 (36.2)                                       | 22 (39.3)                               | 481 (36.6)                                       | 1129 (36.4)                   |
|                   | Abuse                              | 1 (3.2)                                 | 57 (3.4)                                         | 1 (1.8)                                 | 28 (2.1)                                         | 87 (2.8)                      |
|                   | Unknown                            | 0 (0)                                   | 3 (0.2)                                          | 0 (0)                                   | 2 (0.2)                                          | 5 (0.2)                       |
| LTBI treatment†   | Contact                            | 19 (61.3)                               | 950 (55.9)                                       | 40 (71.4)                               | 805 (61.2)                                       | 1814 (58.5)                   |
|                   | Fibrosis                           | 2 (6.5)                                 | 18 (1.1)                                         | 1 (1.8)                                 | 17 (1.3)                                         | 38 (1.2)                      |
|                   | HIV positive                       | 0 (0)                                   | 41 (2.4)                                         | 1 (1.8)                                 | 47 (3.6)                                         | 89 (2.9)                      |
|                   | LTBI (+)                           | 2 (6.5)                                 | 206 (12.1)                                       | 0 (0)                                   | 0 (0)                                            | 208 (6.7)                     |
|                   | TST converter                      | 8 (25.8)                                | 483 (28.4)                                       | 14 (25)                                 | 447 (34)                                         | 952 (30.7)                    |
| Education‡        | High School                        | 19 (61.3)                               | 1104 (65)                                        | 33 (58.9)                               | 810 (61.6)                                       | 1966 (63.4)                   |
|                   | <High School                       | 12 (38.7)                               | 578 (34)                                         | 23 (41.1)                               | 503 (38.2)                                       | 1116 (36)                     |
|                   | Unknown                            | 0 (0)                                   | 13 (0.8)                                         | 0 (0)                                   | 3 (0.2)                                          | 16 (0.5)                      |
| Ethnic Origin     | Non-United States/Canada           | 2 (6.5)                                 | 247 (14.5)                                       | 1 (1.8)                                 | 161 (12.2)                                       | 411 (13.3)                    |
|                   | United States/Canada: Hispanic     | 15 (48.3)                               | 679 (40)                                         | 31 (55.4)                               | 518 (39.4)                                       | 1243 (40.1)                   |
|                   | United States/Canada: non-Hispanic | 14 (45.2)                               | 772 (45.5)                                       | 24 (42.9)                               | 637 (48.4)                                       | 1447 (46.7)                   |

| Characteristic           |         | Regimen 3HP<br>(n = 1,729)              |                                                  | Regimen 9H<br>(n = 1,372)               |                                                  | Total<br>(n = 3,101)<br>n (%) |
|--------------------------|---------|-----------------------------------------|--------------------------------------------------|-----------------------------------------|--------------------------------------------------|-------------------------------|
|                          |         | Reported pregnancy<br>(n = 31)<br>n (%) | Did not report pregnancy<br>(n = 1,698)<br>n (%) | Reported pregnancy<br>(n = 56)<br>n (%) | Did not report pregnancy<br>(n = 1,316)<br>n (%) |                               |
| HIV infection            | No      | 20 (64.5)                               | 976 (57.5)                                       | 29 (51.8)                               | 686 (52.1)                                       | 1711 (55.2)                   |
|                          | Unknown | 11 (35.5)                               | 663 (39)                                         | 26 (46.4)                               | 574 (43.6)                                       | 1274 (41.1)                   |
|                          | Yes     | 0 (0)                                   | 59 (3.5)                                         | 1 (1.8)                                 | 56 (4.3)                                         | 116 (3.7)                     |
| IDU History <sup>§</sup> | No      | 31 (100)                                | 1671 (98.4)                                      | 56 (100)                                | 1284 (97.6)                                      | 3042 (98.2)                   |
|                          | Yes     | 0 (0)                                   | 25 (1.5)                                         | 0 (0)                                   | 31 (2.4)                                         | 56 (1.8)                      |
|                          | Unknown | 0 (0)                                   | 2 (0.1)                                          | 0 (0)                                   | 1 (0.1)                                          | 3 (0.1)                       |
| Jail <sup>  </sup>       | No      | 31 (100)                                | 1674 (98.6)                                      | 56 (100)                                | 1297 (98.6)                                      | 3058 (98.6)                   |
|                          | Yes     | 0 (0)                                   | 24 (1.4)                                         | 0 (0)                                   | 19 (1.4)                                         | 43 (1.4)                      |
| Current Smoker           | No      | 24 (77.4)                               | 1378 (81.2)                                      | 47 (83.9)                               | 1068 (81.2)                                      | 2517 (81.2)                   |
|                          | Yes     | 7 (22.6)                                | 320 (18.8)                                       | 9 (16.1)                                | 248 (18.8)                                       | 584 (18.8)                    |
| Unemployed               | No      | 25 (80.6)                               | 1439 (84.7)                                      | 51 (91.1)                               | 1199 (91.1)                                      | 2714 (87.6)                   |
|                          | Yes     | 6 (19.4)                                | 259 (15.3)                                       | 5 (8.9)                                 | 117 (8.9)                                        | 387 (12.5)                    |
| Homeless                 | No      | 31 (100)                                | 1661 (97.8)                                      | 56 (100)                                | 1286 (97.7)                                      | 3034 (97.8)                   |
|                          | Yes     | 0 (0)                                   | 37 (2.2)                                         | 0 (0)                                   | 30 (2.3)                                         | 67 (2.2)                      |

*Definition of abbreviations:* 3HP = 12-dose once-weekly regimen of isoniazid (900 mg) plus rifapentine (900 mg); 9H = 9-month daily isoniazid (300 mg); HIV = human immunodeficiency virus; IDU = intravenous drug use; IQR = interquartile range; LTBI = latent tuberculosis infection; TST = Tuberculin Skin test.

\* History of Alcohol not reported in 3 non-pregnant women on 3HP, and 1 non-pregnant woman on 9H.

† Subjects were counted only once in the order presented. The total number of HIV-infected persons who were enrolled in the study is listed separately in this table.

‡ Education not reported in 3 non-pregnant women on 3HP.

§ Intravenous drug use ever

|| Jail/Incarceration not reported in 1 non-pregnant woman on 3HP.

**Table E3 Demographic Characteristics Among All Participants who Reported Pregnancy During Treatment or Follow-up (Estimated Date of Conception during Treatment up to 184 Days After the Last Study Dose) Versus Those who did not Report Pregnancy**

| Characteristic    |                                    | Regimen 3HP<br>(n = 1,751)              |                                                  | Regimen 9H<br>(n = 1,388)               |                                                  | Total<br>(n = 3,139)<br>n (%) |
|-------------------|------------------------------------|-----------------------------------------|--------------------------------------------------|-----------------------------------------|--------------------------------------------------|-------------------------------|
|                   |                                    | Reported pregnancy<br>(n = 53)<br>n (%) | Did not report pregnancy<br>(n = 1,698)<br>n (%) | Reported pregnancy<br>(n = 72)<br>n (%) | Did not report pregnancy<br>(n = 1,316)<br>n (%) |                               |
| Age, median (IQR) |                                    | 25 (22-31)                              | 33 (25-42)                                       | 24 (21-29)                              | 33 (25-42)                                       | 33 (25-42)                    |
| Enrollment Site   | Brazil                             | 2 (3.8)                                 | 120 (7.1)                                        | 2 (2.8)                                 | 122 (9.3)                                        | 246 (7.8)                     |
|                   | Hong Kong                          | 0 (0)                                   | 21 (1.2)                                         | 0 (0)                                   | 0 (0)                                            | 21 (0.7)                      |
|                   | Peru                               | 0 (0)                                   | 2 (0.1)                                          | 0 (0)                                   | 7 (0.5)                                          | 9 (0.3)                       |
|                   | South Africa                       | 1 (1.9)                                 | 29 (1.7)                                         | 0 (0)                                   | 0 (0)                                            | 30 (1.0)                      |
|                   | Spain                              | 0 (0)                                   | 75 (4.4)                                         | 0 (0)                                   | 32 (2.4)                                         | 107 (3.5)                     |
|                   | United States/Canada               | 50 (94.3)                               | 1451 (85.5)                                      | 70 (97.2)                               | 1155 (87.8)                                      | 2726 (86.8)                   |
| Race              | American Indian/Alaskan Native     | 0 (0)                                   | 17 (1)                                           | 0 (0)                                   | 11 (0.8)                                         | 28 (0.9)                      |
|                   | Asian/Pacific Islander             | 8 (15.1)                                | 210 (12.4)                                       | 10 (13.9)                               | 166 (12.6)                                       | 394 (12.6)                    |
|                   | Black                              | 6 (11.3)                                | 418 (24.6)                                       | 13 (18.1)                               | 307 (23.3)                                       | 744 (23.7)                    |
|                   | Other                              | 2 (3.8)                                 | 55 (3.2)                                         | 2 (2.8)                                 | 46 (3.5)                                         | 105 (3.3)                     |
|                   | White                              | 37 (69.8)                               | 998 (58.8)                                       | 47 (65.3)                               | 786 (59.7)                                       | 1868 (59.5)                   |
| Alcohol*          | No                                 | 34 (64.2)                               | 1023 (60.2)                                      | 45 (62.5)                               | 805 (61.2)                                       | 1907 (60.8)                   |
|                   | Use                                | 17 (32.1)                               | 615 (36.2)                                       | 26 (36.1)                               | 481 (36.6)                                       | 1139 (36.3)                   |
|                   | Abuse                              | 2 (3.8)                                 | 57 (3.4)                                         | 1 (13.9)                                | 28 (2.1)                                         | 88 (2.8)                      |
|                   | Unknown                            | 0 (0)                                   | 3 (0.2)                                          | 0 (0)                                   | 2 (0.2)                                          | 5 (0.2)                       |
| LTBI treatment†   | Fibrosis                           | 2 (3.8)                                 | 18 (1.1)                                         | 2 (2.8)                                 | 17 (1.3)                                         | 39 (1.2)                      |
|                   | HIV positive                       | 0 (0)                                   | 41 (2.4)                                         | 1 (13.9)                                | 47 (3.6)                                         | 89 (2.8)                      |
|                   | LTBI (+)                           | 2 (3.8)                                 | 206 (12.1)                                       | 0 (0)                                   | 0 (0)                                            | 208 (6.6)                     |
|                   | TST converter                      | 13 (24.5)                               | 483 (28.4)                                       | 20 (27.8)                               | 447 (34)                                         | 963 (30.7)                    |
| Education‡        | High School                        | 30 (56.6)                               | 1104 (65)                                        | 42 (58.3)                               | 810 (61.6)                                       | 1986 (63.3)                   |
|                   | <High School                       | 23 (43.4)                               | 578 (34)                                         | 30 (41.7)                               | 503 (38.2)                                       | 1134 (36.1)                   |
|                   | Unknown                            | 0 (0)                                   | 16 (0.9)                                         | 0 (0)                                   | 3 (0.2)                                          | 19 (0.6)                      |
| Ethnic Origin     | Non-United States/Canada           | 3 (5.7)                                 | 247 (14.5)                                       | 2 (2.8)                                 | 161 (12.2)                                       | 413 (13.2)                    |
|                   | United States/Canada: Hispanic     | 29 (54.7)                               | 679 (40)                                         | 39 (54.2)                               | 518 (39.4)                                       | 1265 (40.3)                   |
|                   | United States/Canada: non-Hispanic | 21 (39.6)                               | 772 (45.5)                                       | 31 (43.1)                               | 637 (48.4)                                       | 1461 (46.5)                   |

| Characteristic |         | Regimen 3HP<br>(n = 1,751)              |                                                  | Regimen 9H<br>(n = 1,388)               |                                                  | Total<br>(n = 3,139)<br>n (%) |
|----------------|---------|-----------------------------------------|--------------------------------------------------|-----------------------------------------|--------------------------------------------------|-------------------------------|
|                |         | Reported pregnancy<br>(n = 53)<br>n (%) | Did not report pregnancy<br>(n = 1,698)<br>n (%) | Reported pregnancy<br>(n = 72)<br>n (%) | Did not report pregnancy<br>(n = 1,316)<br>n (%) |                               |
| HIV infection  | No      | 30 (56.6)                               | 976 (57.5)                                       | 36 (50.0)                               | 686 (52.1)                                       | 1728 (55.0)                   |
|                | Unknown | 23 (43.4)                               | 663 (39)                                         | 35 (48.6)                               | 574 (43.6)                                       | 1295 (41.3)                   |
|                | Yes     | 0 (0)                                   | 59 (3.5)                                         | 1 (13.9)                                | 56 (4.3)                                         | 116 (3.7)                     |
| IDU History§   | No      | 53 (100)                                | 1671 (98.4)                                      | 72 (100)                                | 1284 (97.6)                                      | 3080 (98.1)                   |
|                | Yes     | 0 (0)                                   | 25 (1.5)                                         | 0 (0)                                   | 31 (2.4)                                         | 56 (1.8)                      |
|                | Unknown | 0 (0)                                   | 2 (0.1)                                          | 0 (0)                                   | 1 (0.1)                                          | 3 (0.1)                       |
| Jail           | No      | 53 (100)                                | 1674 (98.6)                                      | 72 (100)                                | 1297 (98.6)                                      | 3096 (98.6)                   |
|                | Yes     | 0 (0)                                   | 24 (1.4)                                         | 0 (0)                                   | 19 (1.4)                                         | 43 (1.4)                      |
| Current Smoker | No      | 44 (83.0)                               | 1378 (81.2)                                      | 60 (83.3)                               | 1068 (81.2)                                      | 2550 (81.2)                   |
|                | Yes     | 9 (17.0)                                | 320 (18.8)                                       | 12 (16.7)                               | 248 (18.8)                                       | 589 (18.8)                    |
| Unemployed     | No      | 46 (86.8)                               | 1439 (84.7)                                      | 66 (91.7)                               | 1199 (91.1)                                      | 2750 (87.6)                   |
|                | Yes     | 7 (13.2)                                | 259 (15.3)                                       | 6 (8.3)                                 | 117 (8.9)                                        | 389 (12.4)                    |
| Homeless       | No      | 53 (100)                                | 1661 (97.8)                                      | 72 (100)                                | 1286 (97.7)                                      | 3072 (97.9)                   |
|                | Yes     | 0 (0)                                   | 37 (2.2)                                         | 0 (0)                                   | 30 (2.3)                                         | 67 (2.1)                      |

*Definition of abbreviations:* 3HP = 12-dose once-weekly regimen of isoniazid (900 mg) plus rifapentine (900 mg); 9H = 9-month daily isoniazid (300 mg); HIV = human immunodeficiency virus; IDU = intravenous drug use; IQR = interquartile range; LTBI = latent tuberculosis infection. TST = Tuberculin Skin test.

\* History of Alcohol not reported in 3 non-pregnant women on 3HP, and 1 non-pregnant woman on 9H.

† Subjects were counted only once in the order presented. The total number of HIV-infected persons who were enrolled in the study is listed separately in this table

‡ Education not reported in 3 non-pregnant women on 3HP.

§ Intravenous drug use ever

|| Jail/Incarceration not reported in 1 non-pregnant woman on 3HP.

**Table E4. Pregnancy Safety Assessment During Exposure with 3HP or 9H Treatment**

|                                                         | 3HP                                      |                                                  | 9H                                       |                                                  |
|---------------------------------------------------------|------------------------------------------|--------------------------------------------------|------------------------------------------|--------------------------------------------------|
|                                                         | Reported pregnancy*<br>(n = 31)<br>n (%) | Did not report pregnancy<br>(n = 1,698)<br>n (%) | Reported pregnancy*<br>(n = 56)<br>n (%) | Did not report pregnancy<br>(n = 1,316)<br>n (%) |
| Duration of study drug exposure, d<br>Median (IQR)      | 718<br>20 (1-80)                         | 119,280<br>78 (1-173)                            | 2,297<br>32.5 (1-242)                    | 314,577<br>274 (1-624)                           |
| Study drug doses received, median (range)               | 8 (4-12)                                 | 12 (12-12)                                       | 160 (76-241)                             | 257 (240-270)                                    |
| Completed study treatment, n (%)                        | 9 (29)                                   | 1,417 (83.5)                                     | 14 (25)                                  | 1,007 (76.5)                                     |
| Pregnancy outcome after last study dose                 | 8 <sup>†</sup>                           | -                                                | 7 <sup>‡</sup>                           | -                                                |
| Participants who reported an adverse event, n (%)       | 0 (0)                                    | 211 (12.4)                                       | 7 (12.5)                                 | 232 (17.6)                                       |
| Discontinued due to an adverse event, n (%)             | 0 (0)                                    | 83 (4.9)                                         | 1 (1.8)                                  | 43 (3.3)                                         |
| <b>Toxicity grade, n (%)<sup>§</sup></b>                |                                          |                                                  |                                          |                                                  |
| Grade 1 or 2                                            | 0 (0)                                    | 143 (8.4)                                        | 6 (10.7)                                 | 177 (13.4)                                       |
| Grade 3 or 4                                            | 0 (0)                                    | 74 (4.4)                                         | 1 (1.8)                                  | 70 (5.3)                                         |
| Grade 5 (Death)                                         | 0 (0)                                    | 4 (0.2)                                          | 0 (0)                                    | 4 (0.3)                                          |
| <b>Adverse event classification, n (%)<sup>  </sup></b> |                                          |                                                  |                                          |                                                  |
| Drug related adverse event                              |                                          |                                                  |                                          |                                                  |
| Hepatotoxicity only                                     | 0 (0)                                    | 8 (0.5)                                          | 1 (1.8)                                  | 37 (2.8)                                         |
| Systemic drug reaction                                  | 0 (0)                                    | 74 (4.4)                                         | 0 (0)                                    | 9 (0.7)                                          |
| Rash only                                               | 0 (0)                                    | 11 (0.6)                                         | 0 (0)                                    | 6 (0.5)                                          |
| Other drug-related adverse event                        | 0 (0)                                    | 41 (2.4)                                         | 3 (5.4)                                  | 29 (2.2)                                         |
| Non-drug related adverse event                          | 0 (0)                                    | 82 (4.8)                                         | 3 (5.4)                                  | 166 (12.6)                                       |

Definition of abbreviations: 3HP = 12-dose once-weekly regimen of isoniazid (900 mg) plus rifapentine (900 mg); 9H = 9-month daily isoniazid (300 mg); IQR = interquartile range

Adverse event other than pregnancy.

\* Women were considered exposed to the study drug(s) during pregnancy if they took at least 1 study dose and if the estimated date of conception was on or before the last study dose date.

† Live birth (6), elective abortion (2)

‡ Live birth (6), fetal loss (1)

§ For participants reporting multiple adverse event with same toxicity, the earliest adverse event is reported.

|| Participants with multiple adverse events can be present in more than one grade toxicities and in more than one adverse event classification.
